# Supplementary material for: Core–shell structured MgAl-LDO@Al-MS hexagonal nanocomposite: an all inorganic acid–base bifunctional nanoreactor for one-pot cascade reactions
Source: Royal Society of Chemistry journal article supplement (doi:10.1039/c3ta13403b), 2013-10-17
Supplement: c3ta13403b.pdf [file c3ta13403b.pdf]

## Supporting Information

### Core-Shell Structured MgAl-LDO@Al-MS Hexagonal Nanocomposite: An All Inorganic Acid-Base Bifunctional Nanoreactor for One-Pot Cascade Reactions

Ping Li,<sup>a, b</sup> Yu Yu,<sup>a, b</sup> Pei-Pei Huang,<sup>a, b</sup> Hua Liu,<sup>a, b</sup> Chang-Yan Cao<sup>a</sup> and Wei-Guo Song<sup>\*a</sup>

<sup>a</sup> *Beijing National Laboratory for Molecular Sciences (BNLMS), Key Laboratory of Molecular Nanostructure and Nanotechnology, Institute of Chemistry, Chinese Academy of Sciences, Beijing, 100190, P. R. China. E-mail: [wsong@iccas.ac.cn](mailto:wsong@iccas.ac.cn); Fax: (+86) 10-62557908*

<sup>b</sup> *Graduate University of Chinese Academy of Sciences, Beijing, 100049, P. R. China*

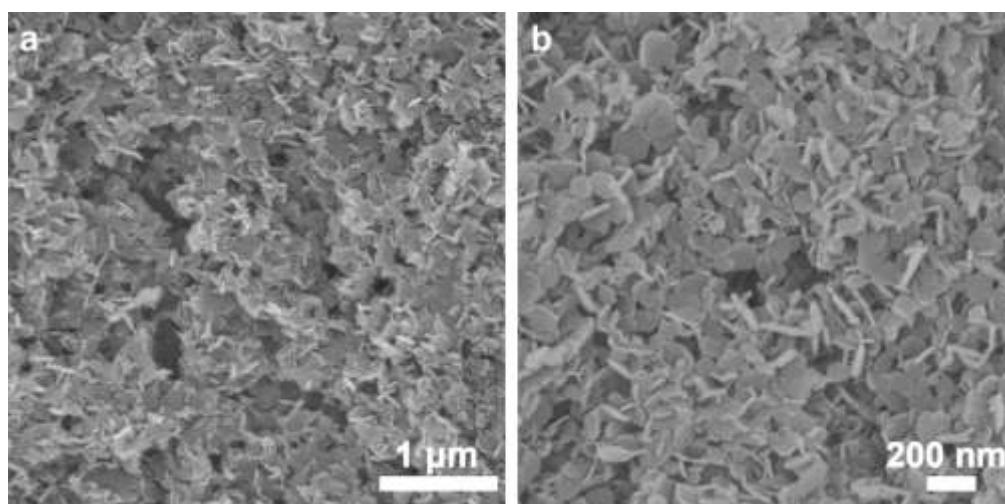

**Figure S1.** SEM images of MgAl-LDO@Al-MS nanocomposite with different magnifications.

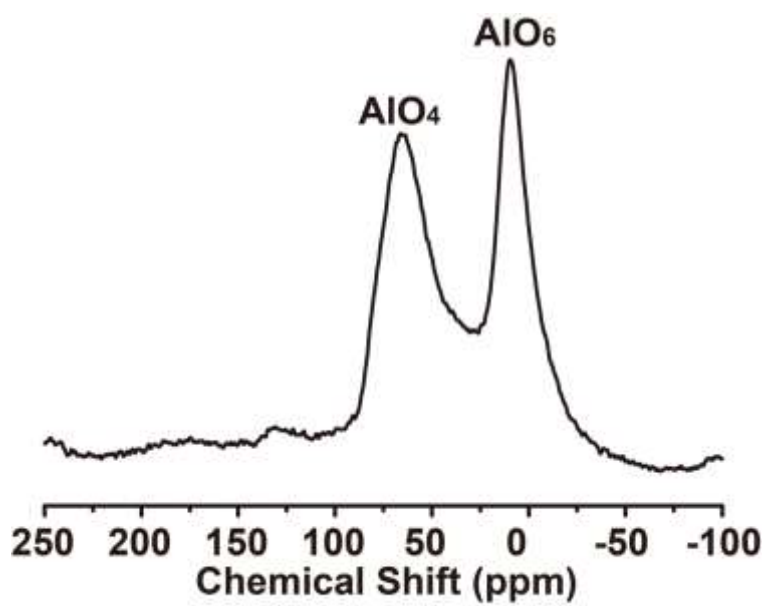

**Figure S2.**  $^{27}\text{Al}$  MAS NMR spectrum of MgAl-LDO@Al-MS nanocomposite.

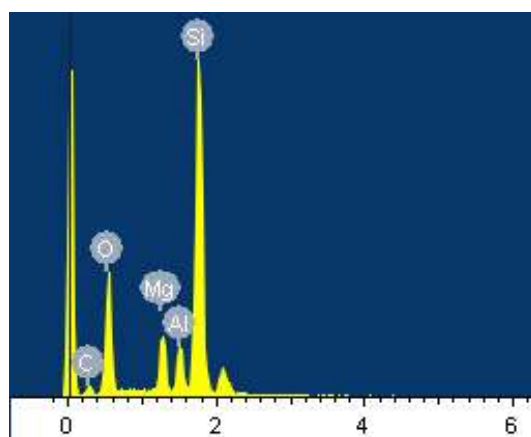

**Figure S3.** EDS spectrum of MgAl-LDO@Al-MS nanocomposite.

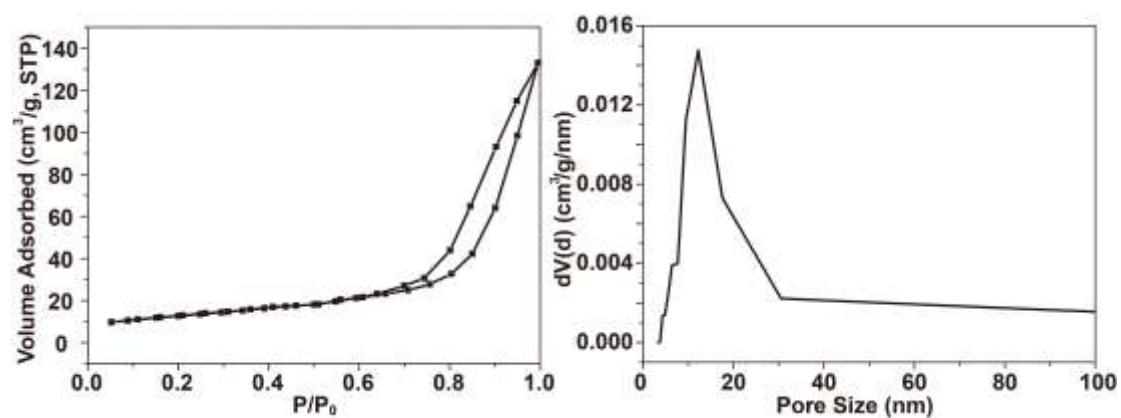

**Figure S4.** N<sub>2</sub> adsorption-desorption isotherm and the NLDFT pore size distribution curve of MgAl-LDH nanoplates.

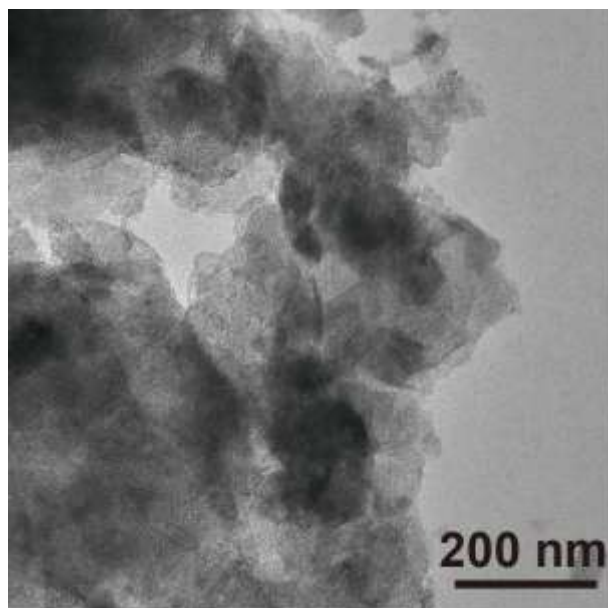

**Figure S5.** TEM image of MgAl-LDO nanoplates.

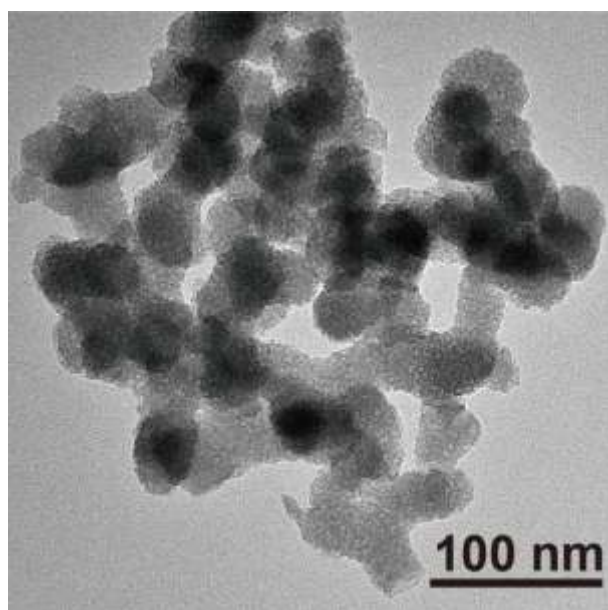

**Figure S6.** TEM image of Al-MS sample.

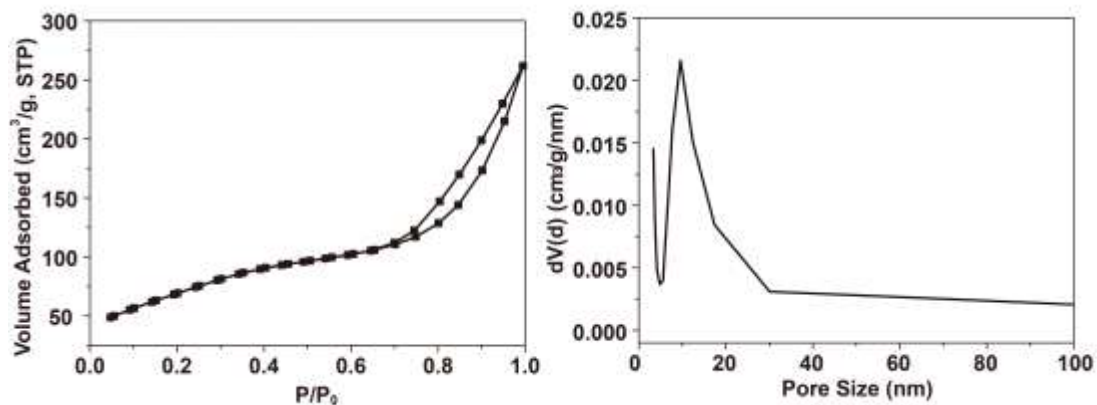

**Figure S7.** N<sub>2</sub> adsorption-desorption isotherm and the NLDFT pore size distribution curve of MgAl-LDO nanoplates.

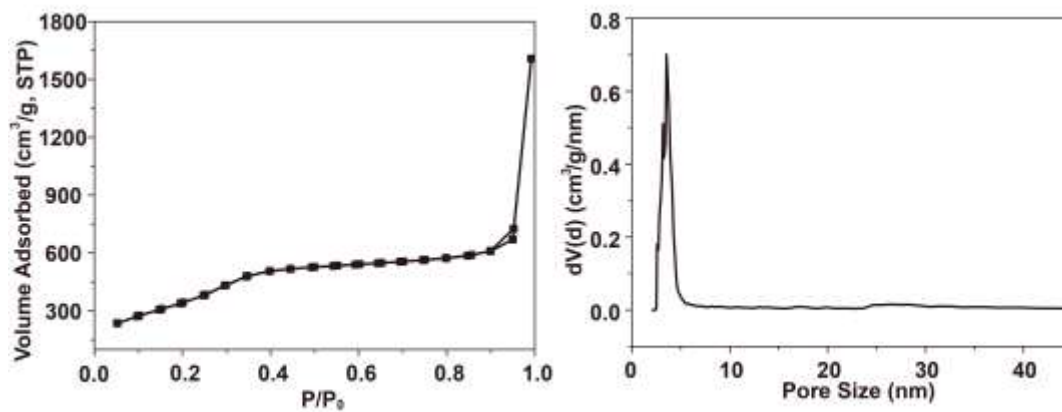

**Figure S8.** N<sub>2</sub> adsorption-desorption isotherm and the NLDFT pore size distribution curve of Al-MS sample.

**Table S1.** Physicochemical parameters of the control samples.

| Sample   | BET surface area (m <sup>2</sup> /g) | Pore volume (cm <sup>3</sup> /g) | NLDFT pore size (nm) |
|----------|--------------------------------------|----------------------------------|----------------------|
| MgAl-LDH | 45.7                                 | 0.21                             | 12.2                 |
| MgAl-LDO | 215.4                                | 0.28                             | 9.6                  |
| Al-MS    | 1378.7                               | 1.06                             | 2.9                  |

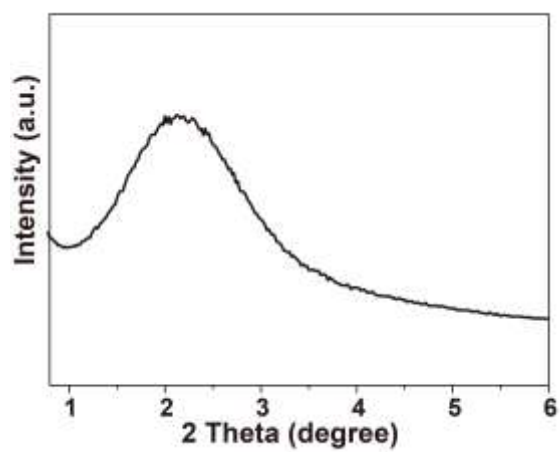

**Figure S9.** Small-angle XRD pattern of Al-MS sample.
